# Supplementary material for: Selective Functional Movement Assessment (SFMA) Reliability and Proposal of Its Use in Sports
Source: Int J Environ Res Public Health. 2023 Jan 22;20(3):2032. doi: 10.3390/ijerph20032032 (PMC9915240; doi:10.3390/ijerph20032032)
Supplement: Supplementary file 1 [file ijerph-20-02032-s001.zip › supplementary Table S2.pdf]

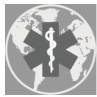

**Supplementary Table S2.** SFMA movement map assigned by Rater A, Rater B1 and Rater B2.

|                                              | FN: Functional non painful |            |            | FP: Functional painful |           |           | DN: Dysfunctional non painful |            |             | DP: Dysfunctional painful |           |           |
|----------------------------------------------|----------------------------|------------|------------|------------------------|-----------|-----------|-------------------------------|------------|-------------|---------------------------|-----------|-----------|
|                                              | Rater A                    | Rater B1   | Rater B2   | Rater A                | Rater B1  | Rater B2  | Rater A                       | Rater B1   | Rater B2    | Rater A                   | Rater B1  | Rater B2  |
| Cervical Flexion: C Flex                     | 18 (64.3%)                 | 18 (64.3%) | 15 (53.6%) | 1 (3.6%)               | 1 (3.6%)  | 1 (3.6%)  | 9 (32.1%)                     | 9 (32.1%)  | 12 (42.9%)  | 0 (0%)                    | 0 (0%)    | 0 (0%)    |
| Cervical Extension: C Ext                    | 21 (75%)                   | 24 (85.7%) | 20 (71.4%) | 1 (3.6%)               | 1 (3.6%)  | 2 (7.1%)  | 5 (17.9%)                     | 2 (7.1%)   | 6 (21.4%)   | 1 (3.6%)                  | 1 (3.6%)  | 0 (0%)    |
| Cervical Rotation Right: C Rot R             | 20 (71.4%)                 | 21 (75%)   | 16 (57.1%) | 1 (3.6%)               | 0 (0%)    | 0 (0%)    | 7 (25%)                       | 6 (21.4%)  | 11 (39.3%)  | 0 (0%)                    | 1 (3.6%)  | 1 (3.6%)  |
| Cervical Rotation Left: C Rot L              | 16 (57.1%)                 | 23 (82.1%) | 15 (53.6%) | 0 (0%)                 | 0 (0%)    | 0 (0%)    | 11 (39.3%)                    | 4 (14.3%)  | 12 (42.9%)  | 1 (3.6%)                  | 1 (3.6%)  | 1 (3.6%)  |
| UE pattern 1 Right                           | 14 (50%)                   | 14 (50%)   | 16 (57.1%) | 1 (3.6%)               | 0 (0%)    | 0 (0%)    | 10 (35.7%)                    | 10 (35.7%) | 8 (28.6%)   | 3 (10.7%)                 | 4 (14.3%) | 4 (14.3%) |
| UE pattern 1 Left                            | 19 (67.9%)                 | 19 (67.9%) | 22 (78.6%) | 0 (0%)                 | 0 (0%)    | 0 (0%)    | 8 (28.6%)                     | 8 (28.6%)  | 5 (17.9%)   | 1 (3.6%)                  | 1 (3.6%)  | 1 (3.6%)  |
| UE pattern 2 Right                           | 25 (89.3%)                 | 24 (85.7%) | 24 (85.7%) | 0 (0%)                 | 1 (3.6%)  | 0 (0%)    | 2 (7.1%)                      | 2 (7.1%)   | 3 (10.7%)   | 1 (3.6%)                  | 1 (3.6%)  | 1 (3.6%)  |
| UE pattern 2 Left                            | 22 (78.6%)                 | 25 (89.3%) | 21 (75%)   | 0 (0%)                 | 0 (0%)    | 0 (0%)    | 6 (21.4%)                     | 3 (10.7%)  | 7 (25%)     | 0 (0%)                    | 0 (0%)    | 0 (0%)    |
| Multi-Segmental Flexion: MSF                 | 14 (50%)                   | 13 (46.4%) | 11 (39.3%) | 1 (3.6%)               | 1 (3.6%)  | 1 (3.6%)  | 10 (35.7%)                    | 11 (39.3%) | 13 (46.4%)  | 2 (7.1%)                  | 2 (7.1%)  | 2 (7.1%)  |
| Multi-Segmental Extension: MSE               | 16 (57.1%)                 | 16 (57.1%) | 16 (57.1%) | 4 (14.3%)              | 3 (10.7%) | 5 (17.9%) | 6 (21.4%)                     | 6 (21.4%)  | 6 (21.4%)   | 1 (3.6%)                  | 2 (7.1%)  | 0 (0%)    |
| Multi-Segmental Rotation Right:<br>MSR Right | 20 (71.1%)                 | 24 (85.7%) | 24 (85.7%) | 1 (3.6%)               | 2 (7.1%)  | 2 (7.1%)  | 6 (21.4%)                     | 2 (7.1%)   | 2 (7.1%)    | 1 (3.6%)                  | 0 (0%)    | 1 (3.6%)  |
| Multi-Segmental Rotation Left:<br>MSR Left   | 15 (53.6%)                 | 23 (82.1%) | 17 (60.7%) | 2 (7.1%)               | 1 (3.6%)  | 2 (7.1%)  | 11 (39.3%)                    | 3 (10.7%)  | 9 (32.1%)   | 0 (0%)                    | 0 (0%)    | 0 (0%)    |
| Single Leg Stance 1 Right: SLS 1<br>Right    | 26 (92.9%)                 | 25 (89.3%) | 27 (96.4%) | 1 (3.6%)               | 1 (3.6%)  | 1 (3.6%)  | 1 (3.6%)                      | 2 (7.1%)   | 0 (0%)      | 0 (0%)                    | 0 (0%)    | 0 (0%)    |
| Single Leg Stance 1 Left: SLS 1 Left         | 27 (96.4%)                 | 27 (96.4%) | 28 (100 %) | 0 (0%)                 | 0 (0%)    | 0 (0%)    | 1 (3.6%)                      | 1 (3.6%)   | 0 (0%)      | 0 (0%)                    | 0 (0%)    | 0 (0%)    |
| Single Leg Stance 2 Right: SLS 2<br>Right    | 17 (60.7%)                 | 14 (50%)   | 25 (89.3%) | 0 (0%)                 | 0 (0%)    | 0 (0%)    | 10 (35.7%)                    | 13 (46.4%) | 3 (10.7%)   | 1 (3.6%)                  | 1 (3.6%)  | 0 (0%)    |
| Single Leg Stance 2 Left: SLS 2 Left         | 22 (78.6%)                 | 21 (75%)   | 22 (78.6%) | 0 (0%)                 | 0 (0%)    | 0 (0%)    | 6 (21.4%)                     | 7 (25%)    | 6 (21.4%)   | 0 (0%)                    | 0 (0%)    | 0 (0%)    |
| Overhead Deep Squat: OHDS                    | 10 (35.7%)                 | 18 (64.3%) | 13 (46.4%) | 2 (7.1%)               | 3 (10.7%) | 2 (7.1%)  | 13 (46.4%)                    | 5 (17.9%)  | 10 (35.7 %) | 3 (10.7%)                 | 2 (7.1%)  | 3 (10.7%) |
